# Supplementary material for: Competency-based learning in an ambulatory care setting: Implementation of simulation training in the Ambulatory Care Rotation during the final year of the MaReCuM model curriculum
Source: PubMed Central journal article supplement (PMC5827188; doi:10.3205/zma001153), 2018-02-15
Supplement: JME-35-6-s-001.pdf [file JME-35-6-s-001.pdf]

## Differences between the experimental and control groups regarding the NKLM learning objectives

### (Part 1)

| NKLM learning objectives                                                                                                 | Group | N  | M <sub>pre</sub> (SD <sub>pre</sub> ) | M <sub>post</sub> (SD <sub>post</sub> ) | Difference                                                                                                              |
|--------------------------------------------------------------------------------------------------------------------------|-------|----|---------------------------------------|-----------------------------------------|-------------------------------------------------------------------------------------------------------------------------|
| Ability to hold professional consultations and apply questioning techniques in manners appropriate to a given situation. | CG    | 13 | 1.9 (0.9)                             | 1.8 (0.6)                               | F <sub>Time</sub> (1)=0.48; p=0.49; η <sup>2</sup> =0.01<br>F <sub>T*Gr</sub> (1)=0.19; p=0.66; η <sup>2</sup> =0.01    |
|                                                                                                                          | EG    | 29 | 2.2 (0.7)                             | 2.2 (0.5)                               | F <sub>Group</sub> (1)=4.07; p=0.05; η <sup>2</sup> =0.09                                                               |
| Ability to give and receive feedback.                                                                                    | CG    | 13 | 1.9 (0.7)                             | 1.9 (0.6)                               | F <sub>Time</sub> (1)=0.21; p=0.65; η <sup>2</sup> =0.01<br>F <sub>T*Gr</sub> (1)=0.21; p=0.65; η <sup>2</sup> =0.01    |
|                                                                                                                          | EG    | 29 | 2.0 (0.5)                             | 1.9 (0.4)                               | F <sub>Group</sub> (1)=0.70; p=0.41; η <sup>2</sup> =0.02                                                               |
| Ability to adequately begin interaction with the patient during consultations.                                           | CG    | 13 | 1.8 (0.6)                             | 1.7 (0.6)                               | F <sub>Time</sub> (1)=0.50; p=0.49; η <sup>2</sup> =0.01<br>F <sub>T*Gr</sub> (1)=0.01; p=0.92; η <sup>2</sup> =0.00    |
|                                                                                                                          | EG    | 29 | 2.1 (0.8)                             | 2.0 (0.3)                               | F <sub>Group</sub> (1)=3.66; p=0.06; η <sup>2</sup> =0.08                                                               |
| Ability to record a structured patient history.                                                                          | CG    | 13 | 2.2 (0.9)                             | 2.0 (0.6)                               | F <sub>Time</sub> (1)=14.26; p<0.0017; η <sup>2</sup> =0.26<br>F <sub>T*Gr</sub> (1)=6.25; p=0.02; η <sup>2</sup> =0.14 |
|                                                                                                                          | EG    | 29 | 2.9 (0.5)                             | 2.1 (0.6)                               | F <sub>Group</sub> (1)=4.67; p=0.04; η <sup>2</sup> =0.11                                                               |
| Ability to write adequate doctor's letters.                                                                              | CG    | 13 | 2.5 (1.0)                             | 2.4 (0.8)                               | F <sub>Time</sub> (1)=5.47; p=0.02; η <sup>2</sup> =0.12<br>F <sub>T*Gr</sub> (1)=3.71; p=0.06; η <sup>2</sup> =0.09    |
|                                                                                                                          | EG    | 29 | 3.7 (0.1)                             | 2.9 (1.1)                               | F <sub>Group</sub> (1)=9.94; p=0.003; η <sup>2</sup> =0.20                                                              |
| Ability to create a plan for diagnostic and therapy together with the patient.                                           | CG    | 13 | 2.9 (0.7)                             | 2.5 (0.8)                               | F <sub>Time</sub> (1)=7.11; p=0.01; η <sup>2</sup> =0.15<br>F <sub>T*Gr</sub> (1)=0.23; p=0.64; η <sup>2</sup> =0.01    |
|                                                                                                                          | EG    | 29 | 3.5 (1.0)                             | 2.9 (0.8)                               | F <sub>Group</sub> (1)=6.12; p=0.02; η <sup>2</sup> =0.13                                                               |
| Ability to properly fill out a medical prescription.                                                                     | CG    | 13 | 3.5 (0.9)                             | 2.8 (1.4)                               | F <sub>Time</sub> (1)=17.61; p<0.0017; η <sup>2</sup> =0.31<br>F <sub>T*Gr</sub> (1)=1.29; p=0.26; η <sup>2</sup> =0.03 |
|                                                                                                                          | EG    | 29 | 4.2 (1.4)                             | 3.0 (1.2)                               | F <sub>Group</sub> (1)=2.20; p=0.15; η <sup>2</sup> =0.05                                                               |
| Ability to involve the relevant people in the treatment and determine their position.                                    | CG    | 13 | 2.31 (1.0)                            | 2.3 (0.6)                               | F <sub>Time</sub> (1)=0.01; p=0.91; η <sup>2</sup> =0.00<br>F <sub>T*Gr</sub> (1)=0.01; p=0.91; η <sup>2</sup> =0.00    |
|                                                                                                                          | EG    | 29 | 2.52 (0.9)                            | 2.5 (0.5)                               | F <sub>Group</sub> (1)=0.93; p=0.34; η <sup>2</sup> =0.02                                                               |
| Ability to recognize mistakes and address them up in an appropriate manner.                                              | CG    | 13 | 2.31 (0.9)                            | 2.1 (0.8)                               | F <sub>Time</sub> (1)=1.76; p=0.19; η <sup>2</sup> =0.04<br>F <sub>T*Gr</sub> (1)=0.01; p=0.94; η <sup>2</sup> =0.00    |
|                                                                                                                          | EG    | 29 | 2.62 (0.7)                            | 2.4 (0.9)                               | F <sub>Group</sub> (1)=2.37; p=0.13; η <sup>2</sup> =0.06                                                               |
| Ability to collaborate professionally, respectfully and efficiently with other medical disciplines.                      | CG    | 13 | 2.00 (0.8)                            | 2.0 (0.7)                               | F <sub>Time</sub> (1)=0.85; p=0.36; η <sup>2</sup> =0.02<br>F <sub>T*Gr</sub> (1)=0.85; p=0.36; η <sup>2</sup> =0.02    |
|                                                                                                                          | EG    | 29 | 2.59 (1.0)                            | 2.2 (0.9)                               | F <sub>Group</sub> (1)=3.15; p=0.08; η <sup>2</sup> =0.07                                                               |
| Ability to communicate with other health professionals using appropriate terminology.                                    | CG    | 13 | 2.08 (0.8)                            | 1.7 (0.6)                               | F <sub>Time</sub> (1)=5.68; p=0.02; η <sup>2</sup> =0.12<br>F <sub>T*Gr</sub> (1)=0.02; p=0.90; η <sup>2</sup> =0.00    |
|                                                                                                                          | EG    | 29 | 2.31 (0.9)                            | 2.0 (0.4)                               | F <sub>Group</sub> (1)=2.30; p=0.14; η <sup>2</sup> =0.05                                                               |
| Ability to present case histories succinctly, clearly and in problem-oriented manner.                                    | CG    | 13 | 2.46 (1.0)                            | 1.8 (0.6)                               | F <sub>Time</sub> (1)=13.17; p<0.0017; η <sup>2</sup> =0.25<br>F <sub>T*Gr</sub> (1)=1.48; p=0.23; η <sup>2</sup> =0.04 |
|                                                                                                                          | EG    | 29 | 0.66 (0.8)                            | 2.3 (0.9)                               | F <sub>Group</sub> (1)=2.56; p=0.12; η <sup>2</sup> =0.06                                                               |

Note: N: number of participants, M<sub>pre</sub>: mean value for pre-measure, SD<sub>pre</sub>: standard deviation for pre-measure, M<sub>post</sub>: mean value for post-measure, SD<sub>post</sub>: standard deviation for post-measure, CG: control group (final year students in the ambulatory care rotation without ambulatory care simulation), EG: experimental group (final year students in the ambulatory care rotation with ambulatory care simulation), F<sub>Time</sub>: effect of time (comparison pre-post measures), F<sub>T\*Gr</sub>: interaction of time and group (intervention effect), F<sub>Group</sub>: effect of group (general difference between CG and EG), Bonferroni alpha adjustment: p<0.0017. 1=completely agree, 2=mostly agree, 3=somewhat agree, 4=somewhat disagree, 5=mostly disagree, 6=completely disagree.

5

10

## Differences between the experimental and control groups regarding the NKLM learning objectives (Part 2)

| NKLM learning objectives                                                                                                                                      | Group | N  | M <sub>pre</sub> (SD <sub>pre</sub> ) | M <sub>post</sub> (SD <sub>post</sub> ) | Difference                                                                                                              |
|---------------------------------------------------------------------------------------------------------------------------------------------------------------|-------|----|---------------------------------------|-----------------------------------------|-------------------------------------------------------------------------------------------------------------------------|
| Ability to integrate health promotion and prevention as basic aspects of individual care.                                                                     | CG    | 13 | 2.8 (0.9)                             | 2.2 (0.8)                               | F <sub>Time</sub> (1)=3.98; p=0.05; η <sup>2</sup> =0.09<br>F <sub>T*Gr</sub> (1)=6.24; p=0.02; η <sup>2</sup> =0.14    |
|                                                                                                                                                               | EG    | 29 | 2.7 (0.9)                             | 2.7 (0.9)                               | F <sub>Group</sub> (1)=0.80; p=0.38; η <sup>2</sup> =0.02                                                               |
| Ability to suggest suitable measures to improve the patient's overall health.                                                                                 | CG    | 13 | 2.5 (1.0)                             | 2.2 (0.8)                               | F <sub>Time</sub> (1)=1.75; p=0.19; η <sup>2</sup> =0.04<br>F <sub>T*Gr</sub> (1)=1.22; p=0.28; η <sup>2</sup> =0.03    |
|                                                                                                                                                               | EG    | 29 | 2.5 (0.8)                             | 2.5 (0.8)                               | F <sub>Group</sub> (1)=0.27; p=0.60; η <sup>2</sup> =0.01                                                               |
| Ability to identify resources for and resistance to such measures.                                                                                            | CG    | 13 | 2.6 (0.7)                             | 2.23 (0.8)                              | F <sub>Time</sub> (1)=5.44; p=0.03; η <sup>2</sup> =0.12<br>F <sub>T*Gr</sub> (1)=0.01; p=0.93; η <sup>2</sup> =0.00    |
|                                                                                                                                                               | EG    | 29 | 2.8 (1.2)                             | 2.4 (0.7)                               | F <sub>Group</sub> (1)=0.42; p=0.52; η <sup>2</sup> =0.01                                                               |
| Ability to name critical organizations and their services with which health promotion can be encouraged.                                                      | CG    | 12 | 2.8 (1.1)                             | 2.2 (0.8)                               | F <sub>Time</sub> (1)=5.66; p=0.02; η <sup>2</sup> =0.13<br>F <sub>T*Gr</sub> (1)=2.76; p=0.11; η <sup>2</sup> =0.07    |
|                                                                                                                                                               | EG    | 29 | 3.0 (0.9)                             | 2.9 (0.8)                               | F <sub>Group</sub> (1)=3.72; p=0.06; η <sup>2</sup> =0.09                                                               |
| Ability to identify and coordinate all persons and healthcare structures involved in providing health care in a concrete patient case.                        | CG    | 13 | 2.6 (0.9)                             | 2.6 (1.0)                               | F <sub>Time</sub> (1)=2.68; p=0.11; η <sup>2</sup> =0.06<br>F <sub>T*Gr</sub> (1)=2.68; p=0.11; η <sup>2</sup> =0.06    |
|                                                                                                                                                               | EG    | 29 | 3.4 (0.)                              | 2.9 (0.9)                               | F <sub>Group</sub> (1)=4.45; p=0.04; η <sup>2</sup> =0.10                                                               |
| Ability to point out economic problems in the context of healthcare and propose solutions.                                                                    | CG    | 13 | 3.4 (1.1)                             | 2.6 (1.0)                               | F <sub>Time</sub> (1)=9.23; p=0.004; η <sup>2</sup> =0.19<br>F <sub>T*Gr</sub> (1)=3.06; p=0.09; η <sup>2</sup> =0.07   |
|                                                                                                                                                               | EG    | 29 | 3.5 (1.1)                             | 3.2 (1.1)                               | F <sub>Group</sub> (1)=1.15; p=0.29; η <sup>2</sup> =0.03                                                               |
| Ability to make initial decisions for an acutely helpless patient while separating the medical and social problems.                                           | CG    | 13 | 2.6 (1.0)                             | 2.6 (1.1)                               | F <sub>Time</sub> (1)=1.33; p=0.26; η <sup>2</sup> =0.03<br>F <sub>T*Gr</sub> (1)=1.33; p=0.26; η <sup>2</sup> =0.03    |
|                                                                                                                                                               | EG    | 29 | 3.0 (1.0)                             | 2.7 (0.8)                               | F <sub>Group</sub> (1)=0.75; p=0.39; η <sup>2</sup> =0.02                                                               |
| Ability to make and justify statements concerning specific instances of incapacity to work, occupational disability and permanently reduced earning capacity. | CG    | 13 | 3.9 (0.1)                             | 2.9 (1.0)                               | F <sub>Time</sub> (1)=15.31; p<0.0017; η <sup>2</sup> =0.28<br>F <sub>T*Gr</sub> (1)=1.84; p=0.18; η <sup>2</sup> =0.04 |
|                                                                                                                                                               | EG    | 29 | 4.3 (1.0)                             | 3.9 (1.1)                               | F <sub>Group</sub> (1)=5.27; p=0.03; η <sup>2</sup> =0.12                                                               |
| Ability to identify measures for quality assurance and act accordingly.                                                                                       | CG    | 13 | 3.2 (1.1)                             | 3.2 (0.8)                               | F <sub>Time</sub> (1)=0.42; p=0.52; η <sup>2</sup> =0.01<br>F <sub>T*Gr</sub> (1)=0.42; p=0.52; η <sup>2</sup> =0.01    |
|                                                                                                                                                               | EG    | 29 | 4.0 (1.1)                             | 3.7 (1.0)                               | F <sub>Group</sub> (1)=4.77; p=0.04; η <sup>2</sup> =0.11                                                               |
| Ability to clearly and truthfully present the chances of success regarding prophylactic, diagnostic and therapeutic measures.                                 | CG    | 13 | 2.7 (1.0)                             | 2.9 (0.9)                               | F <sub>Time</sub> (1)=0.23; p=0.63; η <sup>2</sup> =0.01<br>F <sub>T*Gr</sub> (1)=2.04; p=0.16; η <sup>2</sup> =0.05    |
|                                                                                                                                                               | EG    | 29 | 3.3 (1.0)                             | 3.0 (0.9)                               | F <sub>Group</sub> (1)=2.04; p=0.16; η <sup>2</sup> =0.05                                                               |
| Knowledge of the duty to follow the rules of confidentiality.                                                                                                 | CG    | 13 | 1.2 (0.6)                             | 1.5 (0.7)                               | F <sub>Time</sub> (1)=0.01; p=0.94; η <sup>2</sup> =0.00<br>F <sub>T*Gr</sub> (1)=1.68; p=0.20; η <sup>2</sup> =0.04    |
|                                                                                                                                                               | EG    | 29 | 1.6 (1.0)                             | 1.4 (0.5)                               | F <sub>Group</sub> (1)=0.85; p=0.36; η <sup>2</sup> =0.02                                                               |
| Familiarity with legal release from the duty to remain silent.                                                                                                | CG    | 13 | 2.3 (1.4)                             | 2.0 (1.2)                               | F <sub>Time</sub> (1)=3.67; p=0.06; η <sup>2</sup> =0.08<br>F <sub>T*Gr</sub> (1)=0.13; p=0.72; η <sup>2</sup> =0.00    |
|                                                                                                                                                               | EG    | 29 | 2.7 (1.1)                             | 2.2 (1.0)                               | F <sub>Group</sub> (1)=0.74; p=0.39; η <sup>2</sup> =0.02                                                               |

Note: N: number of participants, M<sub>pre</sub>: mean value for pre-measure, SD<sub>pre</sub>: standard deviation for pre-measure, M<sub>post</sub>: mean value for post-measure, SD<sub>post</sub>: standard deviation for post-measure, CG: control group (final year students in the ambulatory care rotation without ambulatory care simulation), EG: experimental group (final year students in the ambulatory care rotation with ambulatory care simulation), F<sub>Time</sub>: effect of time (comparison pre-post measures), F<sub>T\*Gr</sub>: interaction of time and group (intervention effect), F<sub>Group</sub>: effect of group (general difference between CG and EG), Bonferroni alpha adjustment: p<0.0017. 1=completely agree, 2=mostly agree, 3=somewhat agree, 4=somewhat disagree, 5=mostly disagree, 6=completely disagree.

5

10

## Differences between the experimental and control groups regarding the NKLM learning objectives

### (Part 3)

| NKLM learning objectives                                                                                                     | Group | N  | M <sub>pre</sub> (SD <sub>pre</sub> ) | M <sub>post</sub> (SD <sub>post</sub> ) | Difference                                                                                                                                                                           |
|------------------------------------------------------------------------------------------------------------------------------|-------|----|---------------------------------------|-----------------------------------------|--------------------------------------------------------------------------------------------------------------------------------------------------------------------------------------|
| Ability to document medical activities in a comprehensible manner.                                                           | CG    | 13 | 2.3 (1.0)                             | 1.8 (0.7)                               | F <sub>Time</sub> (1)=13.27; p<0.0017; η <sup>2</sup> =0.25<br>F <sub>T*Gr</sub> (1)=0.26; p=0.61; η <sup>2</sup> =0.01<br>F <sub>Group</sub> (1)=5.01; p=0.03; η <sup>2</sup> =0.11 |
|                                                                                                                              | EG    | 28 | 2.9 (0.9)                             | 2.1 (0.6)                               |                                                                                                                                                                                      |
| Ability to fill out a narcotic prescription form in compliance with the applicable regulations.                              | CG    | 12 | 3.8 (1.3)                             | 4.0 (1.5)                               | F <sub>Time</sub> (1)=6.47; p=0.02; η <sup>2</sup> =0.14<br>F <sub>T*Gr</sub> (1)=13.23; p<0.0017; η <sup>2</sup> =0.25<br>F <sub>Group</sub> (1)=0.15; p=0.70; η <sup>2</sup> =0.00 |
|                                                                                                                              | EG    | 29 | 4.7 (1.2)                             | 3.3 (1.3)                               |                                                                                                                                                                                      |
| Ability to recognize life-threatening, avoidable conditions and apply strategies to avert them.                              | CG    | 12 | 2.5 (0.8)                             | 2.2 (0.9)                               | F <sub>Time</sub> (1)=2.58; p=0.12; η <sup>2</sup> =0.06<br>F <sub>T*Gr</sub> (1)=0.14; p=0.71; η <sup>2</sup> =0.00<br>F <sub>Group</sub> (1)=5.46; p=0.03; η <sup>2</sup> =0.12    |
|                                                                                                                              | EG    | 29 | 2.9 (0.8)                             | 2.7(0.7)                                |                                                                                                                                                                                      |
| Knowledge of the recommendations made by the Standing Committee on Vaccination (STIKO).                                      | CG    | 13 | 2.8 (1.2)                             | 2.8 (1.1)                               | F <sub>Time</sub> (1)=0.17; p=0.69; η <sup>2</sup> =0.00<br>F <sub>T*Gr</sub> (1)=0.17; p=0.69; η <sup>2</sup> =0.00<br>F <sub>Group</sub> (1)=0.07; p=0.79; η <sup>2</sup> =0.00    |
|                                                                                                                              | EG    | 29 | 2.9 (1.1)                             | 2.8 (0.9)                               |                                                                                                                                                                                      |
| Knowledge of the indications for various emergency vehicles and ability to dispatch them appropriately given the indication. | CG    | 13 | 2.4 (1.5)                             | 2.4 (1.5)                               | F <sub>Time</sub> (1)=0.14; p=0.71; η <sup>2</sup> =0.00<br>F <sub>T*Gr</sub> (1)=0.14; p=0.71; η <sup>2</sup> =0.00<br>F <sub>Group</sub> (1)=0.17; p=0.69; η <sup>2</sup> =0.00    |
|                                                                                                                              | EG    | 29 | 2.5 (0.8)                             | 2.6 (1.1)                               |                                                                                                                                                                                      |

Note: N: number of participants, M<sub>pre</sub>: mean value for pre-measure, SD<sub>pre</sub>: standard deviation for pre-measure, M<sub>post</sub>: mean value for post-measure, SD<sub>post</sub>: standard deviation for post-measure, CG: control group (final year students in the ambulatory care rotation without ambulatory care simulation), EG: experimental group (final year students in the ambulatory care rotation with ambulatory care simulation), F<sub>Time</sub>: effect of time (comparison pre-post measures), F<sub>T\*Gr</sub>: interaction of time and group (intervention effect), F<sub>Group</sub>: effect of group (general difference between CG and EG), Bonferroni alpha adjustment: p<0.0017. 1= completely agree, 2=mostly agree, 3=somewhat agree, 4=somewhat disagree, 5=mostly disagree, 6=completely disagree.

5

10
